# Supplementary material
Source: PubMed Central journal article supplement (PMC5125946)
Supplement: NIHMS815007-supplement-1.pdf [file NIHMS815007-supplement-1.pdf]

Table 5. Longitudinal Study: Change or New Onset of Outcomes at Year 3 in 5mm Diameter Maculae of Eyes With vs. Without ODS at Baseline (BL)

|                    |                                              | Overall Comparison    |                       |                      | Subtype Comparison: Eyes with ODS Subtype vs. Eyes with No ODS |               |                      |               |                    |               |                     |               |  |
|--------------------|----------------------------------------------|-----------------------|-----------------------|----------------------|----------------------------------------------------------------|---------------|----------------------|---------------|--------------------|---------------|---------------------|---------------|--|
|                    |                                              | BL Eyes with ODS      | BL Eyes with No ODS   |                      | L-type                                                         |               | H-type               |               | C-type             |               | S-type              |               |  |
|                    |                                              | Number of Eyes        | 55                    | 187                  |                                                                | 31            |                      | 38            |                    | 10            |                     | 9             |  |
|                    |                                              | Mean (SD)             | Mean (SD)             | p-value <sup>a</sup> | Mean (SD)                                                      | p-value       | Mean (SD)            | p-value       | Mean (SD)          | p-value       | Mean (SD)           | p-value       |  |
| Drusen Load        | ΔRPE Drusen Complex (mm <sup>3</sup> )       | 0.02 (0.18)           | 0.03 (0.21)           | 0.1878               | 0.04 (0.15)                                                    | 0.9699        | 0.01 (0.18)          | 0.3977        | <b>0.05 (0.11)</b> | <b>0.0088</b> | 0.06 (0.28)         | 0.8178        |  |
|                    | ΔOCT Drusen (mm <sup>3</sup> )               | 0.03 (0.14)           | 0.03 (0.18)           | 0.2345               | 0.04 (0.12)                                                    | 0.9213        | 0.02 (0.15)          | 0.2954        | <b>0.00 (0.04)</b> | <b>0.0440</b> | 0.08 (0.24)         | 0.9802        |  |
|                    | ΔDrusen Area (DA) <sup>b</sup>               | -0.04 (1.07)          | 0.12 (0.86)           | 0.1568               | 0.00 (0.76)                                                    | 0.5014        | -0.07 (1.23)         | 0.2150        | 0.00 (0.53)        | 0.5014        | -0.14 (0.38)        | 0.2271        |  |
| GA and Pre-atrophy | ΔRAT (x10 <sup>-3</sup> ) (mm <sup>3</sup> ) | <b>2.52 (6.06)</b>    | <b>0.87 (3.42)</b>    | <b>0.0021</b>        | 0.61 (2.44)                                                    | 0.4129        | <b>2.87 (6.95)</b>   | <b>0.0073</b> | <b>4.06 (4.44)</b> | <b>0.0011</b> | <b>2.72 (4.67)</b>  | <b>0.0338</b> |  |
|                    | ΔGeographic Atrophy Area (DA) <sup>b</sup>   | <b>0.51 (1.20)</b>    | <b>0.15 (0.54)</b>    | <b>0.0081</b>        | 0.29 (1.11)                                                    | 0.1779        | <b>0.67 (1.40)</b>   | <b>0.0118</b> | <b>0.30 (0.40)</b> | <b>0.0214</b> | 0.23 (0.64)         | 0.8826        |  |
|                    |                                              | Prop <sup>c</sup> (%) | Prop (%)              |                      | Prop (%)                                                       |               | Prop (%)             |               | Prop (%)           |               | Prop (%)            |               |  |
|                    | New Geographic Atrophy <sup>b</sup>          | <b>9/35 (25.71)</b>   | <b>11/145 (7.59)</b>  | <b>0.0051</b>        | <b>6/23 (26.09)</b>                                            | <b>0.0153</b> | <b>6/23 (26.09)</b>  | <b>0.0153</b> | <b>3/6 (50.00)</b> | <b>0.0109</b> | 1/5 (20.00)         | 0.3448        |  |
|                    | New Central Geographic Atrophy <sup>b</sup>  | 6/42 (14.29)          | 10/159 (6.29)         | 0.1083               | 1/23 (4.35)                                                    | 1.00          | 3/28 (10.71)         | 0.4147        | <b>4/9 (44.44)</b> | <b>0.0031</b> | 1/5 (20.00)         | 0.2964        |  |
|                    | New Photoreceptor Layer Thinning             | <b>14/51 (27.45)</b>  | <b>22/188 (11.70)</b> | <b>0.0081</b>        | 6/29 (20.69)                                                   | 0.2287        | <b>11/35 (31.43)</b> | <b>0.0072</b> | 1/9 (11.11)        | 1.00          | <b>4/8 (50.00)</b>  | <b>0.0119</b> |  |
|                    | New RPE Disruption                           | 8/55 (14.55)          | 18/196 (9.18)         | 0.3144               | 3/32 (9.38)                                                    | 1.00          | 6/37 (16.22)         | 0.2345        | 1/11 (9.09)        | 1.00          | <b>4/10 (40.00)</b> | <b>0.0135</b> |  |
|                    | New RPE Atrophy                              | 7/34 (20.59)          | 27/170 (15.88)        | 0.4614               | 3/20 (15.00)                                                   | 1.00          | 6/24 (25.00)         | 0.2564        | 2/4 (50.00)        | 0.1299        | 1/4 (25.00)         | 0.5076        |  |
|                    | New RPE Atrophy (Foveal)                     | 6/46 (13.04)          | 14/184 (7.61)         | 0.2475               | 3/26 (11.54)                                                   | 0.4488        | 5/34 (14.71)         | 0.1878        | <b>3/8 (37.50)</b> | <b>0.0246</b> | 2/8 (25.00)         | 0.1357        |  |
| Neovascular        | New Intraretinal Fluid                       | <b>17/44 (38.64)</b>  | <b>33/169 (19.53)</b> | <b>0.0153</b>        | 9/23 (39.13)                                                   | 0.0556        | <b>13/29 (44.83)</b> | <b>0.0072</b> | 1/7 (14.29)        | 1.00          | <b>5/8 (62.50)</b>  | <b>0.0122</b> |  |
|                    | New Subretinal Fluid                         | 5/55 (9.09)           | 22/187 (11.76)        | 0.8076               | 2/30 (6.67)                                                    | 0.5426        | 4/37 (10.81)         | 1.00          | 0/11 (0.00)        | 0.6151        | 1/9 (11.11)         | 1.00          |  |
|                    | New CNV <sup>b</sup>                         | 7/60 (11.67)          | 26/198 (13.13)        | 1.00                 | 5/35 (14.29)                                                   | 0.7913        | 6/39 (15.38)         | 0.7973        | 0/12 (0.00)        | 0.3689        | 2/10 (20.00)        | 0.6275        |  |
| Other              | New Subretinal Lesion                        | 7/57 (12.28)          | 13/183 (7.10)         | 0.2702               | 4/32 (12.50)                                                   | 0.2913        | 6/40 (15.00)         | 0.1195        | 1/12 (8.33)        | 0.6020        | 2/10 (20.00)        | 0.1764        |  |
|                    | Hyperreflective Foci                         | UA                    | UA                    | UA                   | UA                                                             | UA            | UA                   | UA            | UA                 | UA            | UA                  | UA            |  |
|                    |                                              | Mean (SD)             | Mean (SD)             |                      | Mean (SD)                                                      |               | Mean (SD)            |               | Mean (SD)          |               | Mean (SD)           |               |  |
|                    | Visual Acuity                                | -3.30 (7.80)          | -2.38 (9.71)          | 0.5037               | -4.20 (5.90)                                                   | 0.0682        | -3.05 (7.85)         | 0.6608        | -4.11 (8.85)       | 0.6862        | -5.00 (9.99)        | 0.6374        |  |
|                    | Neurosensory Retina                          | -0.18 (0.23)          | -0.14 (0.19)          | 0.1516               | -0.18 (0.21)                                                   | 0.2952        | -0.16 (0.24)         | 0.4139        | -0.20 (0.27)       | 0.5005        | -0.08 (0.21)        | 0.4050        |  |

<sup>a</sup>alpha value = 0.05; <sup>b</sup>Derived from color fundus photo grading. All other outcomes were derived from SDOCT imaging; <sup>c</sup>prop= number of eyes with new onset of outcome over number of eyes that did not have outcome at baseline; <sup>d</sup>Data for hyperreflective foci at year 3 were unavailable (UA)
