# Supplementary material
Source: PubMed Central journal article supplement (PMC5125946)
Supplement: NIHMS815007-supplement-4.pdf [file NIHMS815007-supplement-4.pdf]

Table 10. Separate Eye Regional Analysis, Longitudinal Study: Change or New Onset of Outcomes at Year 2 in 0.5mm Diameter Region of Interest (ROI) With ODS Compared to ROI without ODS in Separate Non-ODS AMD Study Eye at Baseline

|             |                                              | Overall Comparison    |                       |                      | Subtype Comparison: Regions with ODS Subtype vs. Regions with No ODS |              |                      |                  |                     |                  |                         |              |
|-------------|----------------------------------------------|-----------------------|-----------------------|----------------------|----------------------------------------------------------------------|--------------|----------------------|------------------|---------------------|------------------|-------------------------|--------------|
|             |                                              | Regions with ODS      | Regions with No ODS   |                      | L-type                                                               |              | H-type               |                  | C-type              |                  | S-type                  |              |
|             |                                              | Number of ROIs        | 148                   | 150                  |                                                                      | 54           | 66                   | 20               | 8                   |                  |                         |              |
|             |                                              | Mean (SD)             | Mean (SD)             | p-value <sup>a</sup> | Mean (SD)                                                            | p-value      | Mean (SD)            | p-value          | Mean (SD)           | p-value          | Mean (SD)               | p-value      |
| Drusen Load | ΔRPE Drusen Complex (mm <sup>3</sup> )       | 0.0003 (0.0057)       | 0.0003 (0.0033)       | 0.883                | 0.0005 (0.0055)                                                      | 0.686        | 0.0000 (0.0061)      | 0.703            | 0.0004 (0.0030)     | 0.752            | 0.0007 (0.0090)         | 0.822        |
|             | ΔOCT Drusen (mm <sup>3</sup> )               | 0.0030 (0.0461)       | 0.0101 (0.0616)       | 0.436                | 0.0089 (0.0502)                                                      | 0.986        | 0.0022 (0.0434)      | 0.326            | 0.0036 (0.0313)     | 0.514            | <b>-0.0311 (0.0615)</b> | <b>0.038</b> |
| Pre-atrophy | ΔRAT (x10 <sup>-3</sup> ) (mm <sup>3</sup> ) | -0.0002 (0.0006)      | 0.0001 (0.0009)       | 0.535                | -0.0002 (0.0006)                                                     | 0.472        | -0.0002 (0.0006)     | 0.683            | -0.0002 (0.0006)    | 0.674            | 0.0000 (0.0000)         | 0.092        |
|             |                                              | Prop <sup>b</sup> (%) | Prop (%)              |                      | Prop (%)                                                             |              | Prop (%)             |                  | Prop (%)            |                  | Prop (%)                |              |
|             | New PRL Thinning Above Drusen                | <b>44/120 (36.67)</b> | <b>23/172 (13.37)</b> | <b>&lt;0.001</b>     | <b>15/53 (28.30)</b>                                                 | <b>0.025</b> | <b>26/52 (50.00)</b> | <b>&lt;0.001</b> | 2/8 (25.00)         | 0.308            | 1/7 (14.29)             | 0.936        |
|             | New PRL Thinning Without Drusen              | <b>28/140 (20.00)</b> | <b>9/177 (5.08)</b>   | <b>0.005</b>         | 7/59 (11.86)                                                         | 0.179        | <b>15/60 (25.00)</b> | <b>0.003</b>     | <b>6/14 (42.86)</b> | <b>&lt;0.001</b> | 0/7 (0.00)              | –            |
|             | New Ellipsoid Zone Loss                      | <b>22/30 (73.33)</b>  | <b>46/104 (44.23)</b> | <b>0.013</b>         | 11/15 (73.33)                                                        | 0.052        | <b>10/14 (71.43)</b> | <b>0.058</b>     | 1/1 (100.00)        | –                | 0/0 (0.00)              | –            |
|             | New RPE Atrophy                              | <b>26/129 (20.16)</b> | <b>12/176 (6.82)</b>  | <b>0.020</b>         | 6/56 (10.71)                                                         | 0.434        | <b>20/58 (34.48)</b> | <b>&lt;0.001</b> | <b>0/8 (0.00)</b>   | –                | 0/7 (0.00)              | –            |
|             | New Choroidal Increased Signal               | <b>20/114 (17.54)</b> | <b>11/172 (6.40)</b>  | <b>0.038</b>         | 7/50 (14.00)                                                         | 0.211        | <b>11/51 (21.57)</b> | <b>0.022</b>     | <b>2/6 (33.33)</b>  | <b>0.038</b>     | 0/7 (20.00)             | –            |
| Neovascular | New Intraretinal Fluid                       | 11/156 (7.05)         | 6/178 (3.37)          | 0.203                | 1/59 (1.69)                                                          | 0.524        | <b>8/66 (12.12)</b>  | <b>0.040</b>     | 0/23 (0.00)         | –                | <b>2/8 (25.00)</b>      | <b>0.008</b> |
|             | New Subretinal Fluid                         | 2/154 (1.30)          | 7/181 (3.87)          | 0.246                | 1/59 (1.69)                                                          | 0.481        | 1/64 (1.56)          | 0.438            | 0/23 (0.00)         | –                | 0/8 (0.00)              | –            |
|             | New Subretinal Lesion                        | 3/153 (1.96)          | 10/172 (5.81)         | 0.107                | 2/58 (3.45)                                                          | 0.504        | 1/64 (1.56)          | 0.205            | 0/23 (0.00)         | –                | 0/8 (0.00)              | –            |
|             | New Hyperreflective Foci                     | <b>26/93 (27.96)</b>  | <b>18/152 (11.84)</b> | <b>0.004</b>         | 10/41 (24.39)                                                        | 0.059        | <b>12/31 (38.71)</b> | <b>0.001</b>     | 3/16 (18.75)        | 0.244            | 1/5 (20.00)             | 0.495        |

<sup>a</sup>P-value based on generalized estimating equations comparison of means and comparison of proportions with alpha value= 0.05; “–” means test could not be carried out due to asymmetric table; <sup>b</sup>Prop= number of eyes with new onset of outcome over number of eyes that did not have outcome at baseline
