# Supplementary material
Source: PubMed Central journal article supplement (PMC5125946)
Supplement: NIHMS815007-supplement-5.pdf [file NIHMS815007-supplement-5.pdf]

Table 11. Separate Eye Regional Analysis, Longitudinal Study: Change or New Onset of Outcomes at Year 3 in 0.5mm Diameter Region of Interest (ROI) With ODS Compared to ROI without ODS in Separate Non-ODS AMD Study Eye at Baseline

|             |                                              | Overall Comparison    |                       |                  | Subtype Comparison: Regions with ODS Subtype vs. Regions with No ODS |              |                      |                  |                         |                  |                  |           |         |
|-------------|----------------------------------------------|-----------------------|-----------------------|------------------|----------------------------------------------------------------------|--------------|----------------------|------------------|-------------------------|------------------|------------------|-----------|---------|
|             |                                              | Regions with ODS      | Regions with No ODS   |                  | L-type                                                               |              | H-type               |                  | C-type                  |                  | S-type           |           |         |
|             |                                              | Number of ROIs        | 130                   | 153              |                                                                      | 41           |                      | 63               |                         | 16               |                  | 10        |         |
|             |                                              |                       | Mean (SD)             | Mean (SD)        | p-value <sup>a</sup>                                                 | Mean (SD)    | p-value              | Mean (SD)        | p-value                 | Mean (SD)        | p-value          | Mean (SD) | p-value |
| Drusen Load | ΔRPE Drusen Complex (mm <sup>3</sup> )       | 0.0003 (0.0048)       | 0.0008 (0.0033)       | 0.681            | 0.0006 (0.0042)                                                      | 0.874        | 0.0002 (0.0052)      | 0.669            | 0.0004 (0.0038)         | 0.979            | -0.0003 (0.0065) | 0.667     |         |
|             | ΔOCT Drusen (mm <sup>3</sup> )               | 0.0017 (0.0351)       | 0.0057 (0.0236)       | 0.657            | 0.0070 (0.0419)                                                      | 0.800        | 0.0005 (0.0303)      | 0.339            | <b>-0.0045 (0.0105)</b> | <b>0.004</b>     | -0.0026 (0.0561) | 0.648     |         |
| Pre-atrophy | ΔRAT (x10 <sup>-3</sup> ) (mm <sup>3</sup> ) | -0.0002 (0.0010)      | -0.0002 (0.0008)      | 0.486            | -0.0001 (0.0003)                                                     | 0.309        | -0.0003 (0.0008)     | 0.576            | -0.0008 (0.0020)        | 0.329            | -0.0042 (0.0110) | 0.435     |         |
|             |                                              | Prop <sup>b</sup> (%) | Prop (%)              |                  | Prop (%)                                                             |              | Prop (%)             |                  | Prop (%)                |                  | Prop (%)         |           |         |
|             | New PRL Thinning Above Drusen                | <b>38/107 (35.51)</b> | <b>19/165 (11.52)</b> | <b>&lt;0.001</b> | <b>12/40 (30.00)</b>                                                 | <b>0.005</b> | <b>19/51 (37.25)</b> | <b>0.001</b>     | <b>5/7 (71.43)</b>      | <b>&lt;0.001</b> | 2/9 (22.22)      | 0.308     |         |
|             | New PRL Thinning Without Drusen              | <b>46/124 (37.10)</b> | <b>20/171 (11.70)</b> | <b>0.001</b>     | <b>16/46 (34.78)</b>                                                 | <b>0.015</b> | <b>22/58 (37.93)</b> | <b>0.002</b>     | <b>5/11 (45.45)</b>     | <b>0.011</b>     | 3/9 (33.33)      | 0.105     |         |
|             | New Ellipsoid Zone Loss                      | 15/26 (57.69)         | 40/96 (41.67)         | 0.200            | 5/12 (41.67)                                                         | 1.00         | 9/13 (69.23)         | 0.056            | 0/0 (0.00)              | –                | 1/1 (100.00)     | –         |         |
|             | New RPE Atrophy                              | <b>29/113 (25.66)</b> | <b>14/169 (8.28)</b>  | <b>0.008</b>     | 9/43 (20.93)                                                         | 0.074        | <b>17/56 (30.36)</b> | <b>0.005</b>     | 1/6 (16.67)             | 0.494            | 2/8 (25.00)      | 0.162     |         |
|             | New Choroidal Increased Signal               | <b>38/101 (37.62)</b> | <b>16/165 (9.70)</b>  | <b>&lt;0.001</b> | <b>13/40 (32.50)</b>                                                 | <b>0.010</b> | <b>21/49 (42.86)</b> | <b>&lt;0.001</b> | 2/5 (40.00)             | 0.061            | 2/7 (28.57)      | 0.164     |         |
| Neovascular | New Intraretinal Fluid                       | 16/137 (11.68)        | 15/171 (8.77)         | 0.489            | 3/46 (6.52)                                                          | 0.678        | 9/64 (14.06)         | 0.269            | 2/17 (11.76)            | 0.654            | 2/10 (20.00)     | 0.208     |         |
|             | New Subretinal Fluid                         | 2/134 (1.49)          | 5/174 (2.87)          | 0.498            | 0/46 (0.00)                                                          | –            | 2/62 (3.23)          | 0.904            | 0/17 (0.00)             | –                | 0/9 (0.00)       | –         |         |
|             | New Subretinal Lesion                        | 11/134 (8.21)         | 20/164 (12.20)        | 0.373            | 4/45 (8.89)                                                          | 0.604        | 5/62 (8.06)          | 0.389            | 1/17 (5.88)             | 0.476            | 1/10 (10.00)     | 0.840     |         |
|             | New Hyperreflective Foci                     | <b>32/80 (40.00)</b>  | <b>22/146 (15.07)</b> | <b>&lt;0.001</b> | 9/32 (28.13)                                                         | 0.101        | <b>15/31 (48.39)</b> | <b>&lt;0.001</b> | <b>6/12 (50.00)</b>     | <b>0.001</b>     | 2/5 (40.00)      | 0.264     |         |

<sup>a</sup>P-value based on generalized estimating equations comparison of means and comparison of proportions with alpha value= 0.05; “–” means test could not be carried out due to asymmetric table; <sup>b</sup>Prop= number of eyes with new onset of outcome over number of eyes that did not have outcome at baseline
